# Supplementary material for: EssC is a specificity determinant for Staphylococcus aureus type VII secretion
Source: PubMed Central journal article supplement (PMC5994694; doi:10.1099/mic.0.000650), 2018-04-05
Supplement: mic-164-816-s001.pdf [file mic-164-816-s001.pdf]

| Name           | Sequence (5' – 3')                 | Restriction site |
|----------------|------------------------------------|------------------|
| essCRN6390fw   | AAATAGATCTAGGACTGAGGCAAG           | <i>Bgl</i> II    |
| essCRN6390rev  | CCTATTGAATTCATTGCTATTTAAACC        | <i>Eco</i> RI    |
| essCfwdSacl    | AAAGAGCTCTAGGACTGAGGCAAAGACAATGC   | <i>Sac</i> I     |
| essCr2EMRSA15  | CAAATCTCATAGAGCTCTCGTTTTATTCAAATAA | <i>Sac</i> I     |
| essCr2ST398    | CATAATTGAGCTCCCTATTGAATTAATTTATTTT | <i>Sac</i> I     |
| essCrevMRSA252 | CTTTATGAGCTCTATCCCTCCATTAG         | <i>Sac</i> I     |

**Table S1.** Oligonucleotides used in this study. The *essC* gene from RN6390 was amplified using oligonucleotides *essCRN6390fw* and *essCRN6390rev* and cloned into plasmid pRAB11 as a *Bgl*II-*Eco*RI fragment. The other three *essC* genes were amplified using the same forward primer (*essCfwdSacl*) and a strain-specific reverse primer and cloned into pRAB11 as *Sac*I fragments. All inserts were confirmed for directionality and fidelity by DNA sequencing.
